# Supplementary material for: Immunolocalization of Some Epidermal Proteins and Glycoproteins in the Growing Skin of the Australian Lungfish (Neoceratodus forsteri)
Source: J Dev Biol. 2023 Aug 14;11(3):35. doi: 10.3390/jdb11030035 (PMC10443291; doi:10.3390/jdb11030035)
Supplement: Supplementary file 1 [file jdb-11-00035-s001.zip]

Archive with 4 entries (4 files):
- figure S1.pdf
- figure S2.pdf
- figure S3.pdf
- Supplementary Figure Legends.pdf
